# Supplementary material
Source: Springer Nature journal article supplement (https://www.springermedizin.de/resource/supplementary/12903_2006_29_MOESM1_ESM.pdf/9517208)
Supplement: MOESM1 [file 9517208]

**Figure 1**

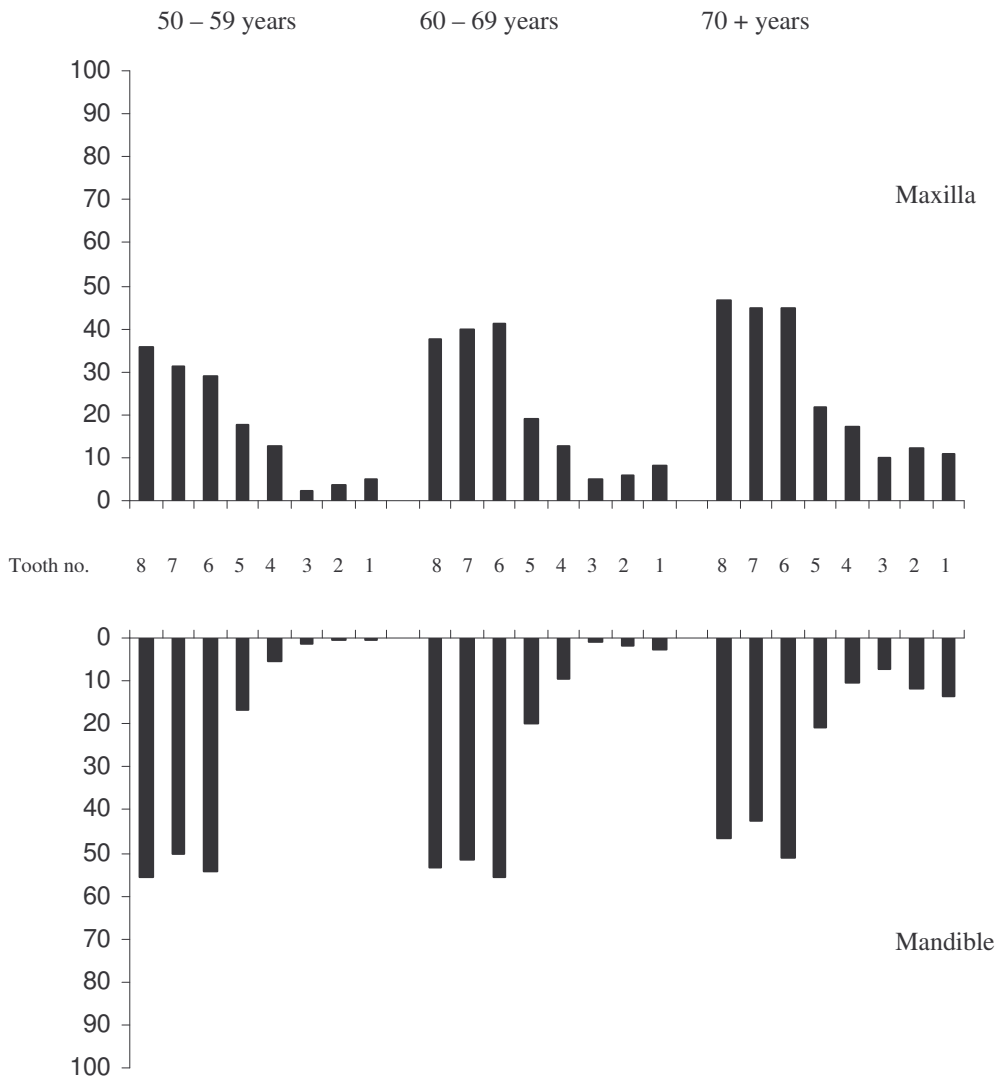

*Tooth number illustration:*

1: Central Incisors, 2: Lateral Incisor, 3: Canine, 4: 1<sup>st</sup> premolar,  
5: 2<sup>nd</sup> premolar, 6: 1<sup>st</sup> molar, 7: 2<sup>nd</sup> molar, 8: 3<sup>rd</sup> molar
